# Supplementary material for: Household Clusters of Severe Acute Respiratory Syndrome Coronavirus 2 (SARS‐CoV‐2) Infection in Suzhou, China
Source: Hindawi journal article supplement (doi:10.1155/2021/5565549), 2021-01-01
Supplement: f1 [file 5565549.f1.pdf]

| Cluster ID | Province     | Patient ID in cluster | Age | Sex    | Urban/Rural | Relationship to index case | Time of onset of illness |
|------------|--------------|-----------------------|-----|--------|-------------|----------------------------|--------------------------|
| 1          | Hubei        | 1                     | 63  | Male   | Urban       | Index case                 | 2020-01-25               |
| 1          | Jiangsu      | 2                     | 64  | Female | Urban       | Spouse                     | 2020-01-26               |
| 1          | Hubei        | 3                     | 38  | Male   | Urban       | Son                        | 2020-01-31               |
| 1          | Shanxi       | 4                     | 37  | Female | Urban       | Daughter-in-law            | 2020-02-01               |
| 1          | Hubei        | 5                     | 9   | Female | Urban       | Granddaughter              | 2020-01-27               |
| 2          | Hubei        | 1                     | 60  | Male   | Urban       | Index case                 | 2020-01-17               |
| 2          | Jiangsu      | 2                     | 49  | Female | Urban       | Spouse                     | 2020-01-27               |
| 2          | Jiangsu      | 3                     | 24  | Male   | Urban       | Son                        | 2020-01-24               |
| 3          | Hubei        | 1                     | 55  | Male   | Urban       | Index case                 | 2020-01-28               |
| 3          | Hubei        | 2                     | 35  | Male   | Urban       | Son                        | 2020-01-31               |
| 3          | Hubei        | 2                     | 33  | Female | Urban       | Daughter-in-law            | 2020-02-01               |
| 4          | Jiangsu      | 1                     | 36  | Male   | Urban       | Index case                 | 2020-01-24               |
| 4          | Jiangsu      | 2                     | 77  | Male   | Urban       | Father                     | Asystematic              |
| 5          | Hubei        | 1                     | 43  | Male   | Urban       | Index case                 | 2020-01-26               |
| 5          | Hubei        | 2                     | 43  | Female | Urban       | Spouse                     | 2020-01-29               |
| 6          | Liaoning     | 1                     | 63  | Female | Urban       | Index case                 | 2020-01-20               |
| 6          | Jiangsu      | 2                     | 11  | Female | Urban       | Grandson                   | 2020-01-29               |
| 7          | Heilongjiang | 1                     | 47  | Male   | Urban       | Index case                 | 2020-01-27               |
| 7          | Heilongjiang | 2                     | 46  | Female | Urban       | Spouse                     | 2020-02-01               |
| 7          | Heilongjiang | 3                     | 22  | Female | Urban       | Daughter                   | 2020-01-28               |
| 8          | Hubei        | 2                     | 64  | Male   | Urban       | Spouse                     | 2020-01-28               |
| 8          | Hubei        | 1                     | 64  | Female | Urban       | Index case                 | 2020-01-22               |
| 9          | Henan        | 1                     | 30  | Male   | Urban       | Index case                 | 2020-01-28               |
| 9          | Henan        | 2                     | 54  | Male   | Urban       | Father                     | 2020-02-05               |
| 9          | Henan        | 3                     | 29  | Female | Urban       | Spouse                     | 2020-02-06               |
| 9          | Henan        | 4                     | 4   | Male   | Urban       | Grandson                   | Asystematic              |
| 10         | Hubei        | 1                     | 49  | Male   | Urban       | Index case                 | 2020-02-14               |
| 10         | Hubei        | 2                     | 47  | Female | Urban       | Spouse                     | Asystematic              |
| 10         | Hubei        | 3                     | 27  | Female | Urban       | Daughter-in-law            | Asystematic              |
| 10         | Hubei        | 4                     | 1   | Female | Urban       | Granddaughter              | Asystematic              |
| 11         | Hubei        | 1                     | 57  | Female | Urban       | Index case                 | 2020-01-26               |
| 11         | Jiangsu      | 2                     | 1   | Male   | Urban       | Grandson                   | 2020-01-27               |
| 12         | Jiangsu      | 1                     | 47  | Male   | Urban       | Index case                 | 2020-01-26               |
| 12         | Hubei        | 2                     | 44  | Female | Urban       | Spouse                     | 2020-02-01               |
| 13         | Jiangsu      | 1                     | 45  | Male   | Urban       | Index case                 | 2020-01-29               |
| 13         | Jiangsu      | 2                     | 25  | Male   | Rural       | Workmate                   | 2020-01-30               |
| 13         | Jiangsu      | 3                     | 34  | Male   | Urban       | Workmate                   | 2020-01-29               |

| Confirmed time | WBC   | HGB | PLT | Neutrophils | Leucocytes | CRP  | PCT    | TBil |
|----------------|-------|-----|-----|-------------|------------|------|--------|------|
| 2020-02-03     | 3.1   | 149 | 111 | 1.45        | 1.12       | 41.8 | 0.034  | 15.1 |
| 2020-02-03     | 6.74  | 126 | 156 | 5.26        | 1.03       | 34.4 | 0.043  | 11   |
| 2020-02-04     | 3.39  | 130 | 169 | 1.81        | 0.89       | 1.2  | 0.029  | 7.1  |
| 2020-02-04     | 3.36  | 138 | 212 | 1.65        | 1.32       | 18   | 0.02   | 7    |
| 2020-02-03     | 8.04  | 132 | 318 | 5.12        | 2.18       | 0.5  | 0.028  | 4.5  |
| 2020-01-25     | 6.06  | 148 | 124 | 3.69        | 1.63       | 23.6 | 0.044  | 9.1  |
| 2020-01-27     | 4.17  | 156 | 227 | 2.76        | 1.05       | 1.5  | <0.020 | 7.7  |
| 2020-01-29     | 8.24  | 170 | 262 | 6.06        | 1.45       | 0.5  | 0.044  | 11.2 |
| 2020-02-06     | 6.13  | 140 | 259 | 3.3         | 2.07       | 0.5  | 0.02   | 6    |
| 2020-02-02     | 1.68  | 140 | 92  | 0.63        | 0.81       | 17.6 | 0.071  | 6    |
| 2020-02-02     | 3.23  | 123 | 82  | 2.4         | 0.58       | 20.4 | 0.028  | 3.5  |
| 2020-01-30     | 6.99  | 151 | 370 | 3.53        | 2.44       | 1    | 0.021  | 16.2 |
| 2020-02-10     | 4.72  | 134 | 272 | 2.57        | 1.34       | 0.5  | 0.076  | 10.1 |
| 2020-01-30     | 5.19  | 135 | 119 | 2.62        | 1.66       | 2.8  | 0.037  | 9.7  |
| 2020-02-02     | 5.57  | 123 | 123 | 3.82        | 1.2        | 31   | 0.022  | 15.1 |
| 2020-01-31     | 6.11  | 135 | 195 | 4.42        | 1.16       | 37.9 | 1.1    | 8.6  |
| 2020-02-02     | 9.1   | 143 | 261 | 5.3         | 3.22       | 0.5  | 0.026  | 7.1  |
| 2020-02-02     | 3.72  | 148 | 115 | 2.24        | 1.09       | 23.8 | 0.043  | 11.1 |
| 2020-02-02     | 3     | 137 | 166 | 1.69        | 1.08       | 22.6 | 0.02   | 8.9  |
| 2020-02-02     | 4.48  | 155 | 188 | 2.36        | 1.59       | 2.7  | 0.02   | 9    |
| 2020-02-03     | 5.9   | 139 | 190 | 4.35        | 0.99       | 5.9  | 0.026  | 17.7 |
| 2020-01-29     | 5.12  | 148 | 152 | 3.17        | 1.36       | 16.2 | 0.068  | 10   |
| 2020-02-03     | 5.12  | 160 | 115 | 3.62        | 0.97       | 24.6 | 0.032  | 5.3  |
| 2020-02-05     | 7.16  | 147 | 207 | 3.54        | 2.77       | 0.5  | 0.029  | 4.6  |
| 2020-02-06     | 6.41  | 126 | 210 | 3.77        | 2.26       | 0.5  | 0.02   | 19.3 |
| 2020-02-22     | 8.14  | 127 | 249 | 3.56        | 3.68       | 0.5  | 0.099  | 6.2  |
| 2020-02-16     | 3.22  | 132 | 167 | 2.09        | 0.85       | 16.3 | 0.036  | 18.1 |
| 2020-02-17     | 6.16  | 96  | 263 | 4.7         | 0.81       | 1.9  | 0.022  | 6.5  |
| 2020-02-17     | 4.27  | 131 | 123 | 1.92        | 1.92       | <0.5 | <0.020 | 8.5  |
| 2020-02-17     | 6.22  | 128 | 287 | 0.76        | 4.92       | <0.5 | 0.025  | 4.8  |
| 2020-01-27     | 6.92  | 121 | 179 | 4.65        | 1.75       | 49   | 0.021  | 10.4 |
| 2020-01-28     | 12.94 | 117 | 212 | 0.63        | 11.46      | 0.5  | 0.034  | 4.8  |
| 2020-02-07     | 4.9   | 143 | 142 | 3.82        | 0.68       | 59.4 | 0.108  | 10.8 |
| 2020-02-09     | 2.89  | 125 | 119 | 1.68        | 0.83       | 2.4  | 0.047  | 10.9 |
| 2020-02-06     | 9.06  | 155 | 307 | 6.31        | 1.9        | 8.3  | <0.020 | 14.1 |
| 2020-02-10     | 7.39  | 162 | 208 | 5.46        | 1.44       | 0.5  | 0.02   | 14.3 |
| 2020-02-13     | 6.23  | 139 | 323 | 3.57        | 1.87       | 25.8 | <0.020 | 16   |

| Albumin | AST | ALT | LDH | BUN  | Cr    | CK  | N-proBNP | cTnT  |
|---------|-----|-----|-----|------|-------|-----|----------|-------|
| 34.3    | 44  | 29  | 525 | 3.43 | 67.1  | 282 | 115      | 9     |
| 36      | 49  | 45  | 830 | 3.83 | 36.7  | 212 | 96       | 10    |
| 38.2    | 21  | 33  | 321 | 3.69 | 82.5  | 144 | 8        | 10    |
| 41.5    | 23  | 21  | 455 | 2.37 | 47.6  | 45  | 25       | 3     |
| 41.7    | 42  | 69  | 689 | 4.14 | 33.7  | 67  | 14       | 4     |
| 39.6    | 17  | 18  | 184 | 6.36 | 86.3  | 182 | 871      | 12    |
| 37      | 18  | 23  | 328 | 3.58 | 63.9  | 21  | 7        | <3.00 |
| 38      | 15  | 36  | 356 | 5.39 | 103.7 | 45  | 42       | 4     |
| 38.3    | 20  | 46  | 362 | 3.86 | 38.9  | 44  | 62       | 3     |
| 36.7    | 82  | 89  | 990 | 5.16 | 67.9  | 609 | 5        | 4     |
| 38.8    | 27  | 23  | 435 | 2.93 | 58.3  | 41  | 90       | 3     |
| 35.8    | 33  | 38  | 505 | 4.56 | 92    | 49  | 35       | 5     |
| 38.9    | 28  | 48  | 342 | 4.72 | 49.6  | 37  | 18       | 7     |
| 37.8    | 32  | 35  | 343 | 5.12 | 95.4  | 38  | <5.00    | 5     |
| 41.2    | 22  | 17  | 370 | 3.68 | 63.2  | 38  | 11       | <3.00 |
| 33.4    | 30  | 35  | 592 | 3.94 | 33    | 23  | 58       | 3     |
| 44      | 24  | 41  | 423 | 5.32 | 43.4  | 29  | 5        | 3     |
| 32.8    | 32  | 29  | 804 | 6.09 | 88.9  | 128 | 16       | 6     |
| 40      | 22  | 21  | 460 | 3.02 | 46.3  | 45  | 41       | 3     |
| 38.5    | 21  | 22  | 381 | 3.09 | 59.2  | 32  | 21       | 3     |
| 32.8    | 26  | 26  | 229 | 2.66 | 53.8  | 57  | 27       | 9     |
| 34.5    | 43  | 49  | 540 | 3.68 | 66    | 56  | 5        | 4     |
| 31.6    | 28  | 33  | 423 | 3.91 | 57.9  | 20  | 11       | <3.00 |
| 39.1    | 24  | 44  | 307 | 6.51 | 55.3  | 25  | 23       | 3     |
| 36.9    | 14  | 31  | 313 | 4.2  | 43.1  | 22  | 31       | 3     |
| 43      | 26  | 31  | 434 | 5.15 | 21.4  | 101 | 54       | 6     |
| 35      | 24  | 45  | 506 | 3    | 63.8  | 62  | 43       | 7     |
| 39.9    | 15  | 25  | 349 | 3.44 | 44.9  | 24  | 59       | <3.00 |
| 39.7    | 20  | 30  | 322 | 3.7  | 50.1  | 36  | 6        | <3.00 |
| 38.5    | 55  | 53  | 637 | 3.78 | 16.9  | 84  | 169      | 6     |
| 41.3    | 38  | 34  | 626 | 4.93 | 61.4  | 70  | 43       | 7     |
| 39.2    | 49  | 24  | 558 | 4.63 | 14.2  | 82  | 319      | 5     |
| 34.6    | 32  | 29  | 360 | 4.1  | 66.3  | 137 | 78       | 13    |
| 38.3    | 21  | 19  | 254 | 2.66 | 52.8  | 74  | 23       | 5     |
| 37      | 86  | 271 | 732 | 8.37 | 69.6  | 25  | 17       | <3.00 |
| 43.5    | 29  | 97  | 394 | 4.05 | 69    | 42  | 5        | 3     |
| 34.1    | 24  | 49  | 477 | 3.56 | 82    | 53  | 101      | 12    |

| CK-MB  | Myoglobin | Fever | Cough | Sputum production | Diarrhea | Vomiting | Nausea | Fatigue |
|--------|-----------|-------|-------|-------------------|----------|----------|--------|---------|
| 3.04   | 46.77     | 1     | 1     | 1                 | 0        | 1        | 1      | 0       |
| 3.32   | 59.01     | 0     | 0     | 0                 | 1        | 0        | 0      | 1       |
| 0.94   | 36.03     | 1     | 1     | 0                 | 0        | 0        | 0      | 0       |
| 1.02   | 21        | 0     | 1     | 1                 | 0        | 0        | 0      | 0       |
| 1.68   | 21        | 0     | 1     | 0                 | 0        | 0        | 0      | 0       |
| 1.73   | 46.39     | 1     | 1     | 0                 | 0        | 0        | 0      | 0       |
| <0.300 | <21.00    | 1     | 1     | 1                 | 0        | 0        | 0      | 0       |
| 0.41   | 29.53     | 1     | 1     | 1                 | 0        | 0        | 0      | 0       |
| 0.49   | 21        | 0     | 1     | 0                 | 0        | 0        | 0      | 0       |
| 0.38   | 101.3     | 1     | 1     | 1                 | 0        | 0        | 0      | 0       |
| 0.3    | 21        | 1     | 0     | 0                 | 0        | 0        | 0      | 0       |
| 0.61   | 21        | 1     | 1     | 1                 | 0        | 0        | 0      | 0       |
| 0.96   | 21        | 0     | 0     | 0                 | 0        | 0        | 0      | 0       |
| 0.34   | <21.00    | 1     | 1     | 1                 | 0        | 0        | 0      | 0       |
| <0.300 | 24.54     | 1     | 0     | 0                 | 0        | 0        | 0      | 0       |
| 0.42   | 21        | 1     | 1     | 0                 | 0        | 0        | 0      | 0       |
| 0.32   | 21        | 0     | 1     | 1                 | 0        | 0        | 0      | 0       |
| 0.51   | 47.16     | 1     | 1     | 1                 | 0        | 0        | 0      | 0       |
| 0.46   | 21        | 0     | 1     | 1                 | 0        | 0        | 0      | 0       |
| 0.3    | 21        | 0     | 1     | 1                 | 0        | 0        | 0      | 0       |
| 1.19   | 25.73     | 1     | 1     | 0                 | 0        | 0        | 0      | 1       |
| 0.6    | 23.59     | 1     | 1     | 1                 | 0        | 0        | 0      | 0       |
| <0.300 | <21.00    | 1     | 0     | 0                 | 1        | 0        | 0      | 1       |
| 0.56   | 21        | 1     | 0     | 0                 | 0        | 0        | 0      | 0       |
| 0.56   | 21        | 0     | 0     | 0                 | 0        | 0        | 0      | 1       |
| 5.18   | <21       | 0     | 0     | 0                 | 0        | 0        | 0      | 0       |
| 0.43   | 23.95     | 1     | 1     | 1                 | 1        | 0        | 0      | 0       |
| 0.79   | <21.00    | 0     | 0     | 0                 | 0        | 0        | 0      | 0       |
| 0.6    | <21.00    | 0     | 0     | 0                 | 0        | 0        | 0      | 0       |
| 4.37   | <21.00    | 0     | 0     | 0                 | 0        | 0        | 0      | 0       |
| <0.300 | <21.00    | 1     | 0     | 0                 | 0        | 0        | 0      | 0       |
| 2.58   | 21        | 1     | 0     | 0                 | 0        | 0        | 0      | 0       |
| 0.98   | 44.81     | 1     | 1     | 1                 | 0        | 0        | 0      | 1       |
| <0.300 | <21.00    | 1     | 0     | 0                 | 0        | 0        | 0      | 0       |
| 0.45   | 26.8      | 1     | 1     | 1                 | 0        | 0        | 0      | 1       |
| 0.41   | 21        | 1     | 1     | 1                 | 0        | 0        | 0      | 0       |
| 0.42   | 28.81     | 0     | 1     | 1                 | 0        | 0        | 0      | 0       |

| <b>Runny nose</b> | <b>Sore muscles</b> | <b>Sore throat</b> |
|-------------------|---------------------|--------------------|
| 0                 | 0                   | 0                  |
| 0                 | 0                   | 0                  |
| 0                 | 0                   | 0                  |
| 0                 | 0                   | 0                  |
| 0                 | 0                   | 1                  |
| 0                 | 0                   | 0                  |
| 1                 | 0                   | 0                  |
| 0                 | 0                   | 0                  |
| 0                 | 0                   | 0                  |
| 0                 | 0                   | 0                  |
| 0                 | 0                   | 0                  |
| 0                 | 0                   | 0                  |
| 0                 | 0                   | 0                  |
| 0                 | 0                   | 0                  |
| 0                 | 0                   | 1                  |
| 0                 | 0                   | 0                  |
| 0                 | 0                   | 0                  |
| 0                 | 0                   | 0                  |
| 0                 | 0                   | 0                  |
| 1                 | 0                   | 0                  |
| 0                 | 0                   | 0                  |
| 0                 | 0                   | 0                  |
| 0                 | 1                   | 0                  |
| 0                 | 0                   | 0                  |
| 0                 | 0                   | 0                  |
| 0                 | 0                   | 0                  |
| 0                 | 0                   | 0                  |
| 0                 | 0                   | 0                  |
| 0                 | 0                   | 0                  |
| 0                 | 0                   | 0                  |
| 0                 | 0                   | 0                  |
| 0                 | 0                   | 0                  |
| 1                 | 0                   | 0                  |
| 0                 | 0                   | 1                  |
| 0                 | 0                   | 0                  |
| 0                 | 0                   | 0                  |
| 0                 | 0                   | 0                  |
